# Supplementary material for: The Coxiella burnetii Dot/Icm System Delivers a Unique Repertoire of Type IV Effectors into Host Cells and Is Required for Intracellular Replication
Source: PubMed Central journal article supplement (PMC3102713; doi:10.1371/journal.ppat.1002056), 2011-05-26

Supplementary Figure 4

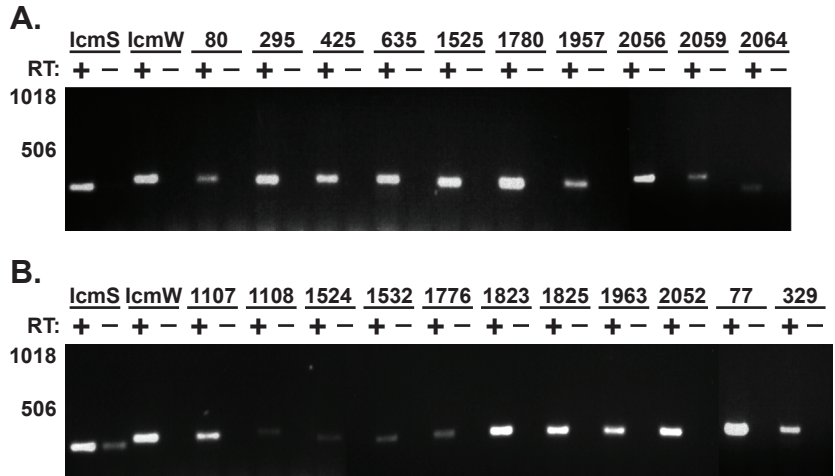

Supplement: ppat.1002056.s004.pdf [file ppat.1002056.s004.pdf]
